# Supplementary material
Source: PubMed Central journal article supplement (PMC5636690)
Supplement: NIHMS864489-supplement-Supp_TableS1.pdf [file NIHMS864489-supplement-Supp_TableS1.pdf]

| Gene name              | Accession Number    | Primer F                | Primer R                     | Product length |
|------------------------|---------------------|-------------------------|------------------------------|----------------|
| <b>Cb1 (Cnr1)</b>      | NM_212820.1         | GACGGCACAAAGGTGCAGA     | TTGATGTTGTCCCCCATCCG         | 161            |
| <b>Cb2 (Cnr2)</b>      | NM_212964.3         | ATTGCAAGCTCCACAGCACT    | AAACGCCATTGTGACGCCA          | 180            |
| <b>Abhd4</b>           | NM_001017613.1      | AGTATGCCAGTCTGTCTCGTCG  | TCCAGAAGTGGACTCGGCG          | 104            |
| <b>Abhd6A</b>          | ENSDART00000173312  | CGATTCTGTTACTCTCACAGAG  | AGGGAGAACTTCACCACC           | 111            |
| <b>Abhd6B</b>          | ENSDART00000135269  | CGGAGAACTCTGGGTCTGC     | TGGGAAGTACTTCAGCATGG         | 160            |
| <b>Abhd12</b>          | NM_001076597.1      | GCGGAGGATACTGATCTGGC    | TACGGTACCCGCACAAAGTT         | 114            |
| <b>MgII</b>            | NM_200297.2         | GGGATCCCAAACAGGTGGAG    | AAAGGGCCACCTGATGTCTG         | 137            |
| <b>Faah</b>            | NM_001109825.1      | GTGGCCGTCTTAACAGTGCT    | GAAGAGTTTGTCCCACGGGT         | 155            |
| <b>Faah2A</b>          | NM_001002700.2      | GCCGGAAGGAAGTTACGAGT    | GGCACTCCAAGCAGAGGTAG         | 199            |
| <b>DaglA</b>           | ENSDARG00000062956  | CAGCCATCTTGATCAGGCAA    | ATAAACGGGCCAGCCATATGC        | 170            |
| <b>DaglB</b>           | ENSDARG00000089888  | CTTCATGGACACAGATCTGGT   | TATGGGAGAGGACGGACTG          | 130            |
| <b>Nape-PLD</b>        | NM_001080613.2      | CACATCGCAGGTGTTTGTGC    | TGCCAAGTTGACCAAGGGTT         | 169            |
| <b>Gde1</b>            | NM_200243.1         | CTGCTATAAGAGCGGCGAGT    | CCACGGTTTTTCATCGTGCATC       | 102            |
| <b>Ptgs2a (Cox-2)</b>  | NM_153657.1         | CCTTTGAGGAGATGACAGGAGAC | GGCCAGGATACAGCTCAACC         | 90             |
| <b>Ptpn22</b>          | NM_001099420.1      | GCACCAGATGGGATACAGCA    | GGAGCCGTTTTTGGCTTCTG         | 150            |
| <b>Gpr55a</b>          | NM_001039991.1      | GAACTCCTCCAACCTCATCGACA | AGCCCAGGATCAAAGGGATG         | 101            |
| <b>PparAB</b>          | NM_001102567.1      | CAGGACGAGTTCACCTCCAC    | TCCGACGGAAGAAACCCTTG         | 118            |
| <b>PparG</b>           | ENSDART00000039950  | TGATGGTGGGCATGTACAC     | GATAGGACTCGTAGAGATGTGCG<br>G | 156            |
| <b>Naaa1A (Asah1A)</b> | NM_001006088        | TCACTGGAATTAGACCTGGTG   | GCTTCGTCTGAGAAAGCTGG         | 192            |
| <b>Cnrip1A</b>         | NM_001003607.2      | CATCGAGTTCAAAGACGCCG    | TTGGGTTTGGCCTCGTACTC         | 126            |
| <b>Elf1A (ct)</b>      | from McCurley et al | CTTCTCAGGCTGACTGTGC     | CCGCTAGCATTACCCTCC           | ----           |
